# Supplementary material
Source: bioRxiv or medRxiv preprint supplement (https://medrxiv.org/highwire/filestream/95091/field_highwire_adjunct_files/0/2020.08.29.20184135-1.pdf)
Supplement: Supplementary file [file 2020.08.29.20184135-1.pdf]

# Supplementary Materials

## Model parameters

## Model calibration

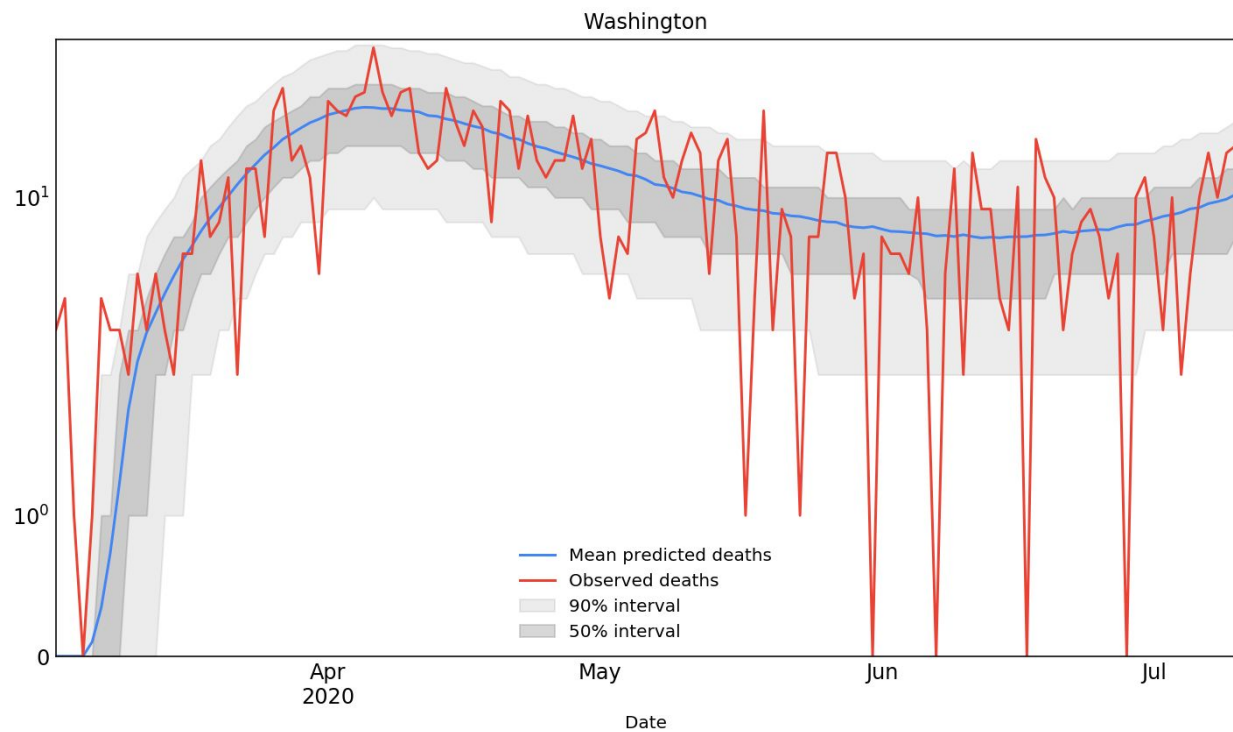

*Fig. S1. A Bayesian SEIR model fit to Washington state epidemiological data allowing infection rate to vary as a function of human mobility and a latent changepoint to account for unobserved changes in human behavior. See Liu et al. (36) for more detail on the methodology.*

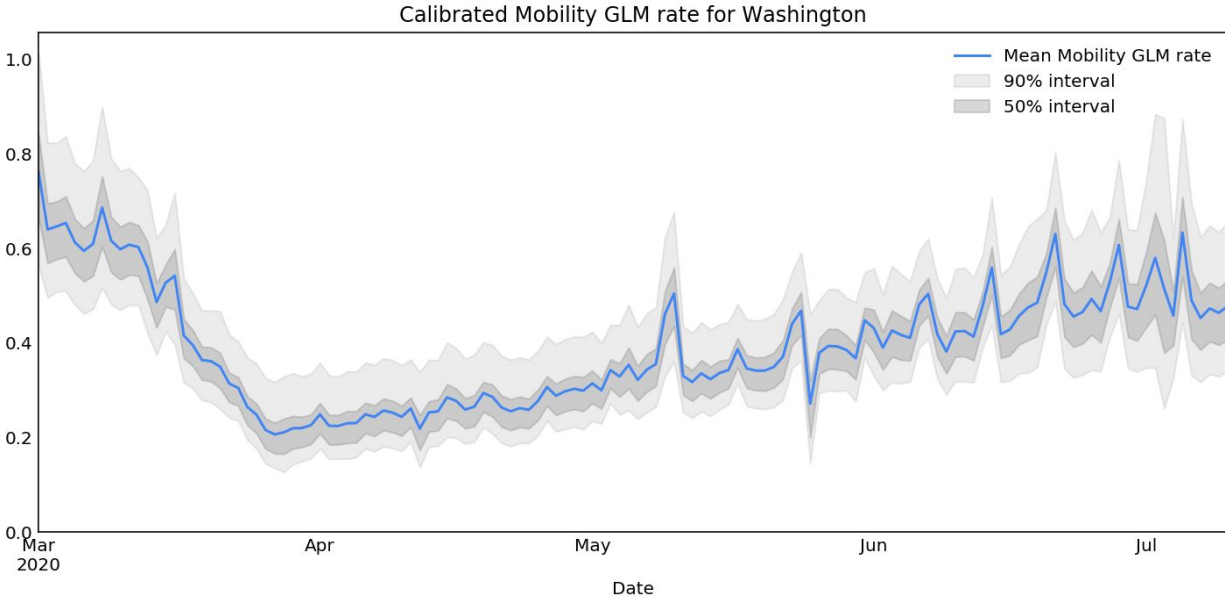

*Fig. S2. The coefficients from the a generalizable linear model (GLM) fit as part of the above Bayesian SEIR model to predict the time-varying infection rate as a function of aggregated and anonymized mobility data from the Community Mobility Reports. The learned coefficients are used to scale the number of synthetic agent interactions in the random and occupation networks in the OpenABM-Covid19 model.*

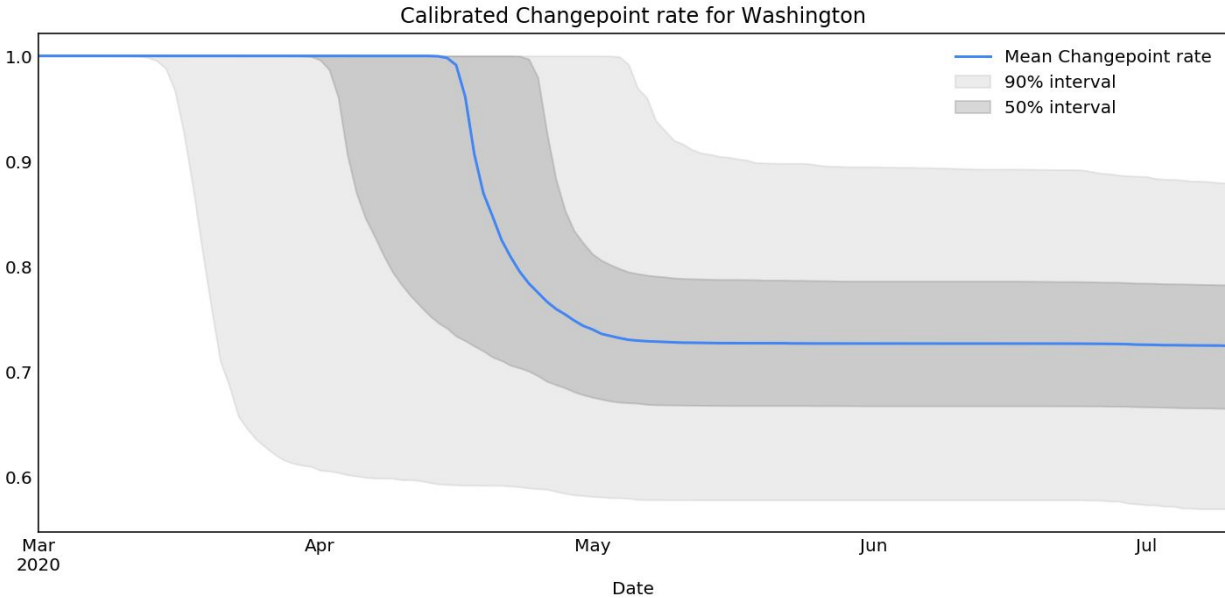

*Fig. S3. The coefficients of a latent changepoint, modeled as a negative sigmoid, fit as part of the Bayesian SEIR model to predict the time-varying infection rate. The learned coefficients are used to scale the time-dependent infectious rate in the OpenABM-Covid19 model.*

| County | Initial Infectious Rate | Seeding date (date when the |
|--------|-------------------------|-----------------------------|
|--------|-------------------------|-----------------------------|

|           |      | county reaches 30 infections) |
|-----------|------|-------------------------------|
| King      | 5.02 | 02/05/2020                    |
| Pierce    | 5.22 | 02/16/2020                    |
| Snohomish | 5.18 | 02/12/2020                    |

*Table S1. The initial infectious rate and seeding date for each county, computed via an exhaustive grid search where OpenABM-Covid19 outputs best match COVID-19 mortality from epidemiological data in the county.*

### Synthetic population and households

|                          | King County | Pierce County | Snohomish County |
|--------------------------|-------------|---------------|------------------|
| household_size_1         | 329,114     | 106,018       | 87,197           |
| household_size_2         | 306,979     | 113,855       | 102,421          |
| household_size_3         | 139,176     | 57,920        | 52,794           |
| household_size_4         | 115,757     | 47,534        | 46,414           |
| household_size_5         | 45,162      | 21,908        | 19,812           |
| household_size_6         | 30,375      | 14,740        | 13,048           |
| population_0_9           | 278,073     | 126,887       | 110,638          |
| population_10_19         | 258,328     | 122,564       | 108,699          |
| population_20_29         | 317,005     | 124,748       | 99,418           |
| population_30_39         | 359,688     | 127,308       | 116,327          |
| population_40_49         | 323,457     | 118,680       | 119,699          |
| population_50_59         | 307,938     | 121,318       | 120,245          |
| population_60_69         | 229,274     | 92,467        | 84,857           |
| population_70_79         | 109,487     | 45,409        | 39,978           |
| population_80            | 69,534      | 25,599        | 22,222           |
| n_total                  | 2,252,784   | 904,980       | 822,083          |
| app_users_fraction_0_9   | 0.23        |               |                  |
| app_users_fraction_10_19 | 0.75        |               |                  |
| app_users_fraction_20_29 | 0.96        |               |                  |
| app_users_fraction_30_39 | 0.92        |               |                  |
| app_users_fraction_40_49 | 0.92        |               |                  |

|                          |      |
|--------------------------|------|
| app_users_fraction_50_59 | 0.79 |
| app_users_fraction_60_69 | 0.66 |
| app_users_fraction_70_79 | 0.53 |
| app_users_fraction_80    | 0.53 |

*Table S2. The household (number of households with N person(s)), overall population, and smartphone population distribution for King, Pierce, and Snohomish counties.*

### Occupational sectors

| NAICS Code | Sector Name                                         | Employment Size* |               |                  |
|------------|-----------------------------------------------------|------------------|---------------|------------------|
|            |                                                     | King County      | Pierce County | Snohomish County |
| 11         | Agriculture, Forestry, Fishing and Hunting          | 7,952            | 3,008         | 4,725            |
| 21         | Mining                                              | 1,244            | 546           | 548              |
| 22         | Utilities                                           | 5,813            | 1,916         | 351              |
| 23         | Construction                                        | 226,711          | 72,603        | 72,510           |
| 31-33      | Manufacturing                                       | 315,030          | 52,807        | 181,570          |
| 42         | Wholesale Trade                                     | 188,971          | 39,099        | 27,194           |
| 44-45      | Retail Trade                                        | 499,834          | 108,437       | 106,976          |
| 48-49      | Transportation and Warehousing                      | 156,542          | 54,590        | 14,446           |
| 51         | Information                                         | 373,581          | 6,495         | 12,623           |
| 52         | Finance and Insurance                               | 126,708          | 25,076        | 28,694           |
| 53         | Real Estate Rental and Leasing                      | 88,850           | 15,908        | 9,819            |
| 54         | Professional, Scientific, and Technical Services    | 399,492          | 31,437        | 40,091           |
| 55         | Management of Companies and Enterprises             | 94,516           | 2,474         | 4,366            |
| 56         | Administrative and Support and Waste Management and | 223,083          | 67,857        | 44,478           |

|    |                                               |         |         |         |
|----|-----------------------------------------------|---------|---------|---------|
|    | Remediation Services                          |         |         |         |
| 61 | Educational Services                          | 73,614  | 14,574  | 6,370   |
| 62 | Health Care and Social Assistance             | 476,480 | 153,035 | 102,666 |
| 71 | Arts, Entertainment, and Recreation           | 79,193  | 14,771  | 11,224  |
| 72 | Accommodation and Food Services               | 350,659 | 85,375  | 69,380  |
| 81 | Other Services (except Public Administration) | 144,458 | 33,609  | 22,195  |

\* Employment size is estimated based on the employment data in 2019 Q4.

*Table S3. Sizes of occupational networks used for King, Pierce, and Snohomish counties.*

| NAICS Code | Sector Name                                                              | Adjustment factor |
|------------|--------------------------------------------------------------------------|-------------------|
| 11         | Agriculture, Forestry, Fishing and Hunting                               | 2.0               |
| 21         | Mining                                                                   | 1.0               |
| 22         | Utilities                                                                | 1.0               |
| 23         | Construction                                                             | 1.0               |
| 31-33      | Manufacturing                                                            | 1.0               |
| 42         | Wholesale Trade                                                          | 0.25              |
| 44-45      | Retail Trade                                                             | 0.67              |
| 48-49      | Transportation and Warehousing                                           | 1.25              |
| 51         | Information                                                              | 0.25              |
| 52         | Finance and Insurance                                                    | 0.67              |
| 53         | Real Estate Rental and Leasing                                           | 0.50              |
| 54         | Professional, Scientific, and Technical Services                         | 0.50              |
| 55         | Management of Companies and Enterprises                                  | 0.50              |
| 56         | Administrative and Support and Waste Management and Remediation Services | 0.80              |

|    |                                               |      |
|----|-----------------------------------------------|------|
| 61 | Educational Services                          | 0.33 |
| 62 | Health Care and Social Assistance             | 2.85 |
| 71 | Arts, Entertainment, and Recreation           | 0.50 |
| 72 | Accommodation and Food Services               | 0.78 |
| 81 | Other Services (except Public Administration) | 0.67 |

Table S4. Adjustment of mean work interactions based on (32).

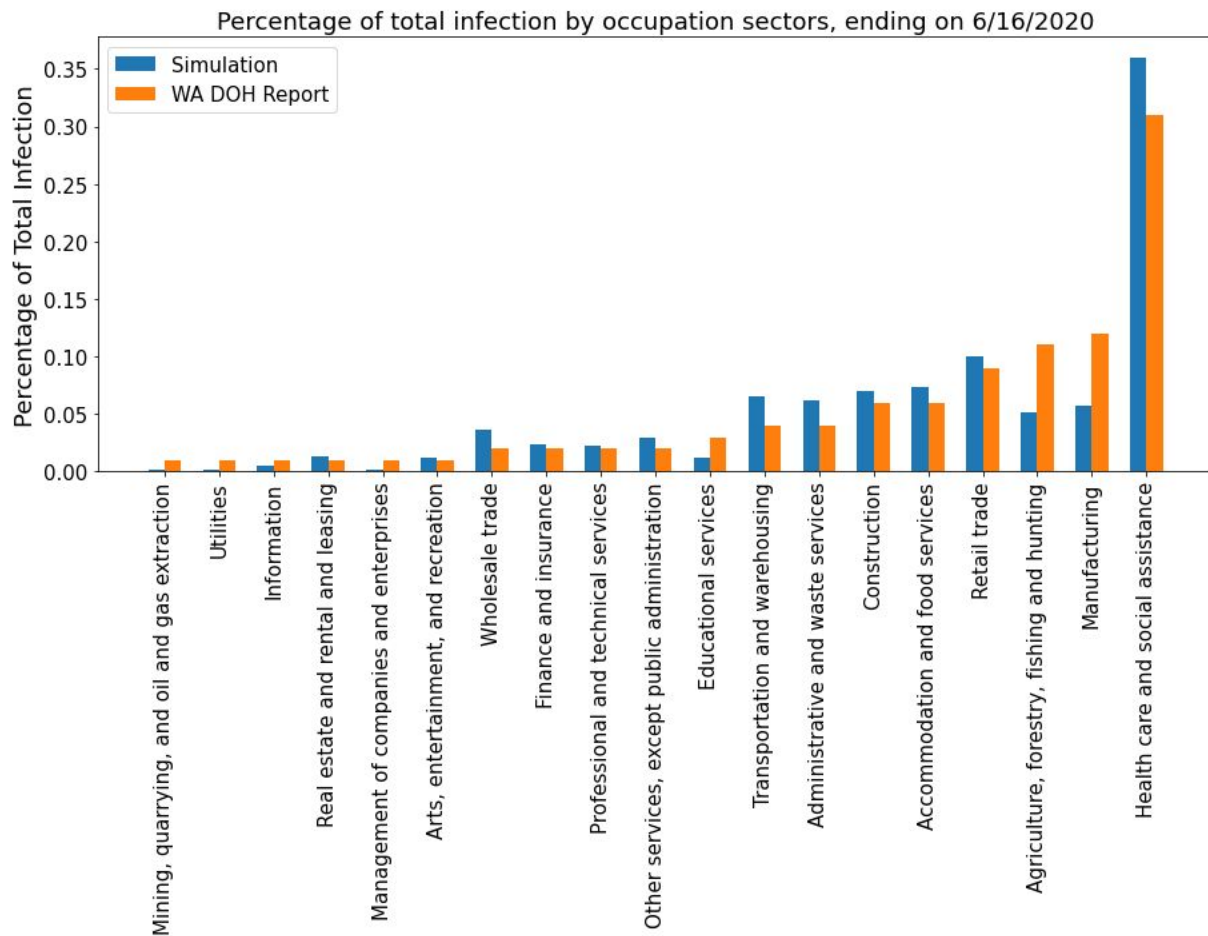

Figure S4. The percentage of total infected cases by occupation sector as reported by the Occupation Industry Report (32) by Washington State Department of Health (state-wide) vs. the OpenABM-Covid19 simulation across King, Pierce, and Snohomish counties.

### Sensitivity analysis of detected exposure fraction

The detected exposure fraction is the proportion of infection-spreading interactions that are detected by the app and trigger exposure notifications. Our analysis shows that the

effectiveness of a digital exposure system is impacted by this parameter, especially at the moderate adoption rates (Fig. S5, S6). In particular, changes in the detected exposure fraction at low levels significantly affects the rate of new infections across all adoption rates. Increasing adoption is sufficient to counterbalance the effects of lower detection fractions, and conversely, increasing detection fractions improves the performance of exposure notification under lower adoption scenarios (Fig. S6).

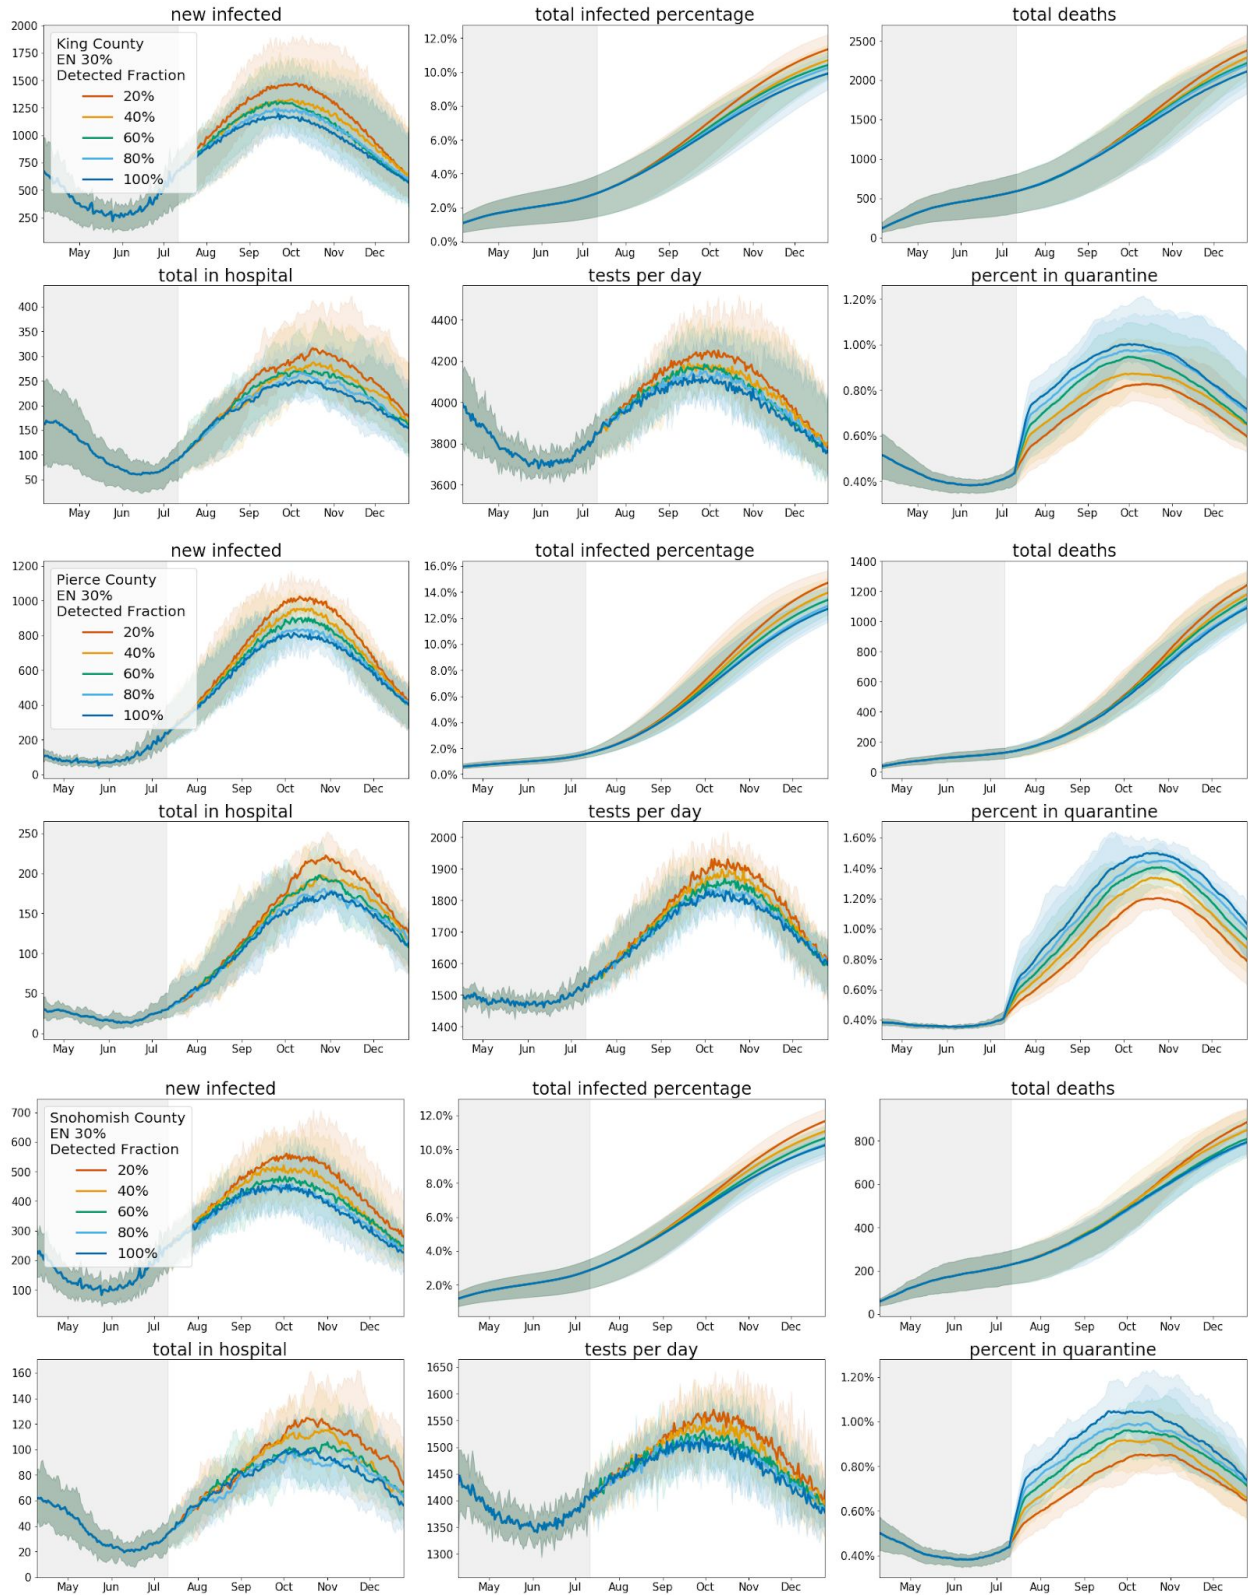

**Figure S5.** Result of varying the detected exposure fraction at 40% digital exposure notification adoption on the epidemic in King, Pierce, and Snohomish counties.



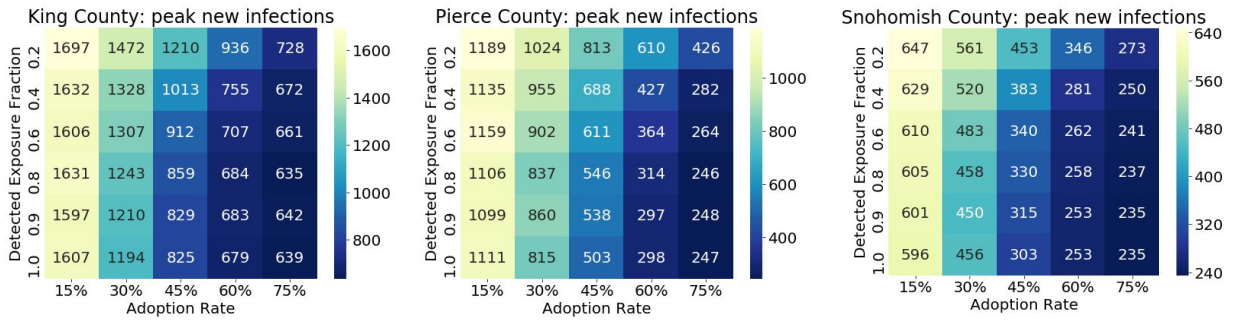

*Figure S6. The peak new infections after the baseline period of the simulation as a result of varying the detected exposure fraction and digital exposure notification adoption in King, Pierce, and Snohomish counties.*
